# Supplementary material for: China’s aerosol cleanup has contributed strongly to the recent acceleration in global warming
Source: Research Square preprint supplement (doi:10.21203/rs.3.rs-6005409/v1), 2025-02-19
Supplement: Supplementary file 1 [file fa9c07c5c939d7fd0aae9d53.docx]

**China’s aerosol cleanup has contributed strongly to the recent acceleration in global warming**

Bjørn H. Samset*1, Laura J. Wilcox2, Robert J. Allen3, Camilla W. Stjern1, Marianne T. Lund1, Sharar Ahmadi2, Maxwell T. Elling4,5, Luke Fraser-Leach6, Paul Griffiths7, James Keeble8, Tsuyoshi Koshiro9, Paul Kushner6, Anna Lewinschal10, Risto Makkonen11, Joonas Merikanto11, Pierre Nabat12, Larissa Narazenko13,14, Declan O’Donnell11, Naga Oshima9, Steven T. Rumbold15, Toshihiko Takemura16, Kostas Tsigaridis13,14, Daniel M. Westervelt14,17

Supplementary Materials

**Supplementary Figure****s**


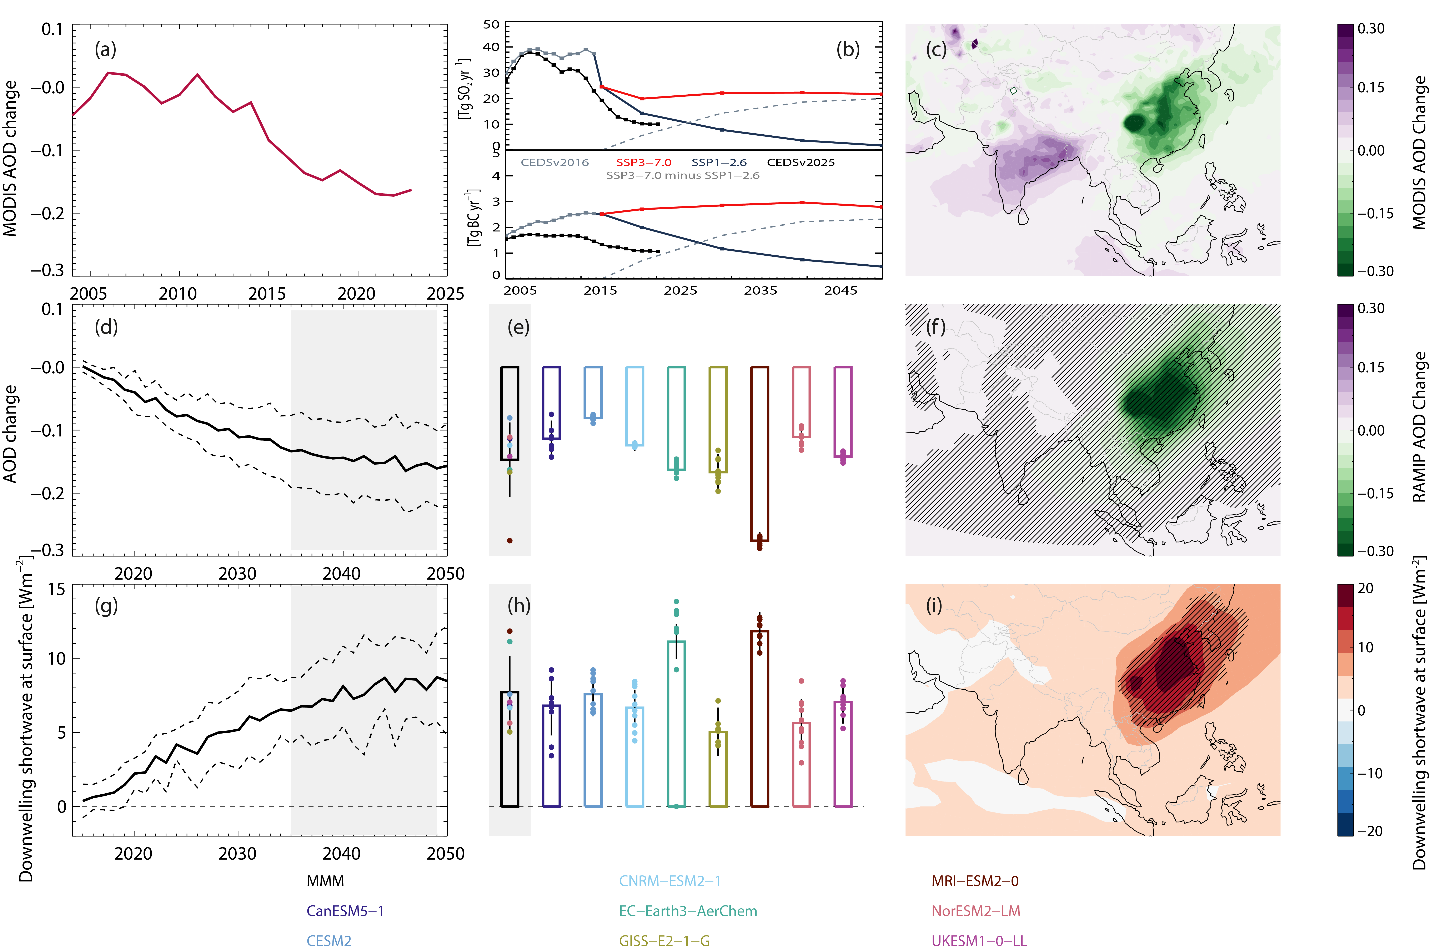


Supplementary Figure 1: Observed changes in aerosol optical depth since 2010, and the corresponding changes in the RAMIP model simulations. (a) Reduction in annual mean Aerosol Optical Depth (AOD) over East Asia, relative to 2005-2010. Mean of MODIS Aqua and Terra. (b) Annual emissions of SO2 (top) and BC aerosols (bottom) from CEDSv2025 (black), and the two scenarios used by RAMIP (red, blue). The older CEDSv2016 used by CMIP6 is also shown. Dashed line shows the emissions perturbation simulated by RAMIP. (c) As (a), spatially resolved, difference between 2014-2023 and 2005-2014. (d) AOD change in the RAMIP simulations, multi-model mean and ±1 standard deviation range. (e) Individual ensemble member (dots), model means (colored boxes) and multi-model mean (black box) AOD difference in RAMIP, for 2035-2049. (f) Spatial distribution of AOD change in RAMIP, multi-model mean. Hatching indicates statistical significance (see Methods). (g-i) As d-f, for downwelling shortwave radiation at the surface.


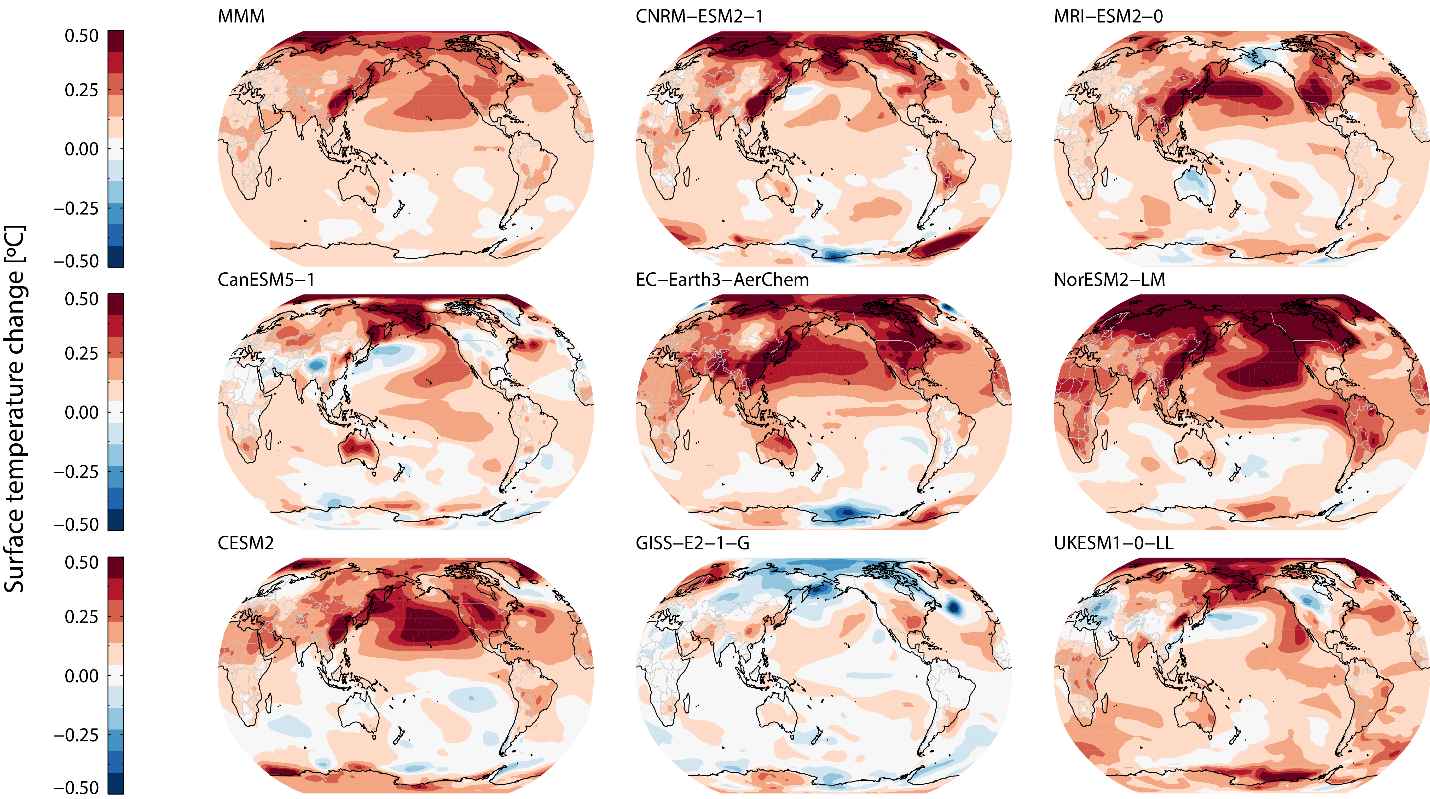


Supplementary Figure 2: RAMIP surface temperature response to East Asian aerosol emissions reductions. Multi-model mean and individual model annual mean temperature change for the 2035-2049 period, difference between the *East Asia* and *baseline* simulations. Each model result is the mean of 10 ensemble members.


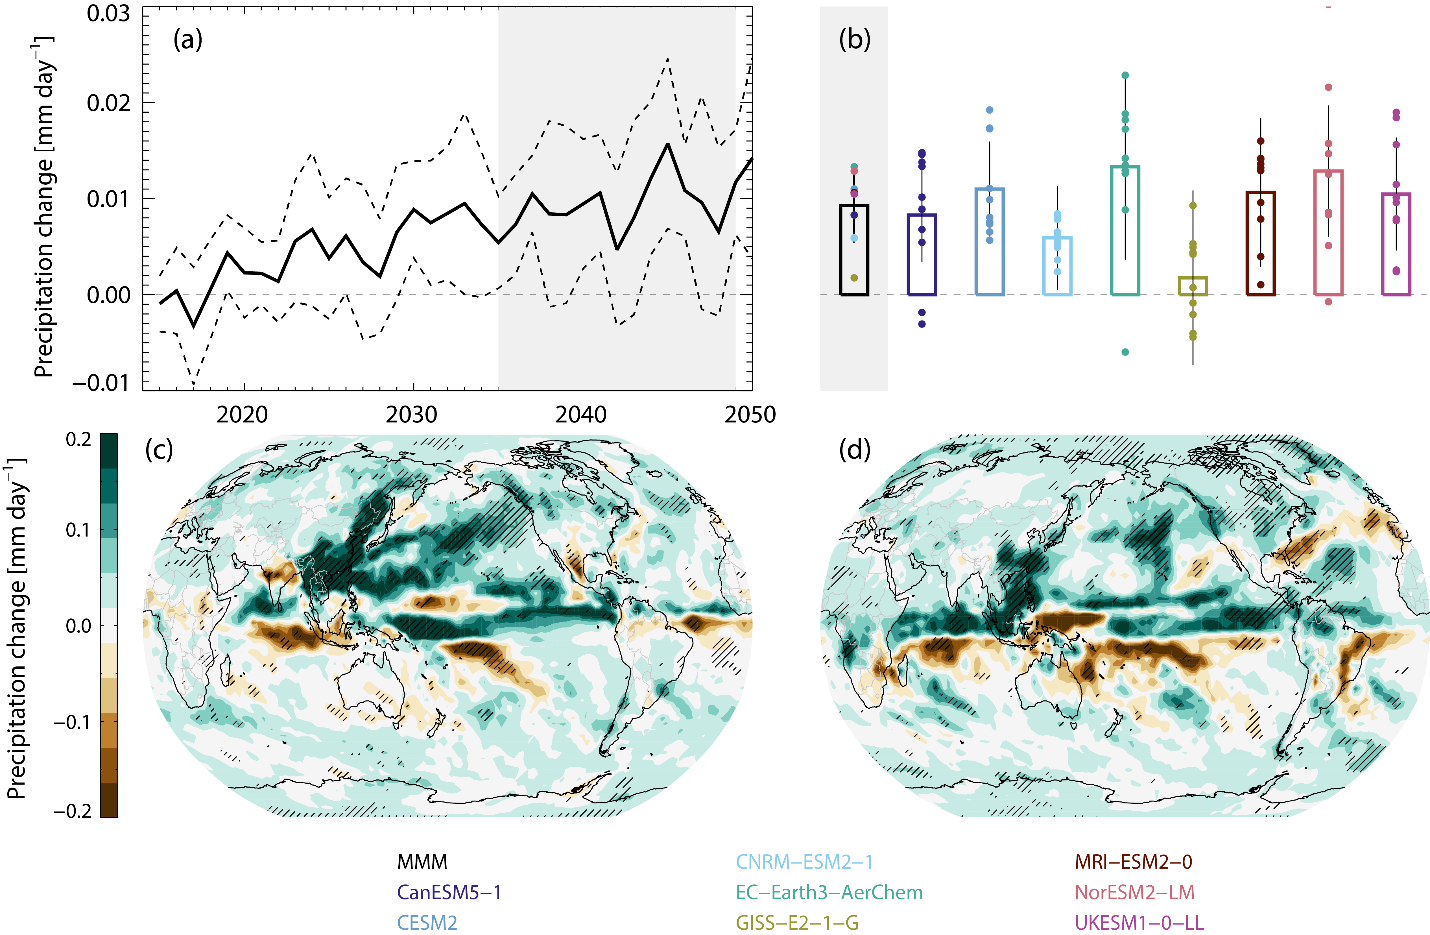


Supplementary Figure 3: Precipitation responses to reductions in East Asian aerosol emissions. (a) Global, annual mean precipitation response to the RAMIP East Asian aerosol emissions perturbations, multi-model mean and ±1 standard deviation range. (b) Ensemble member, model mean and multi-model mean precipitation response for 2035-2049. (c) Multi-model spatial response, for June-July-August. (d) As c, for December-January-February.


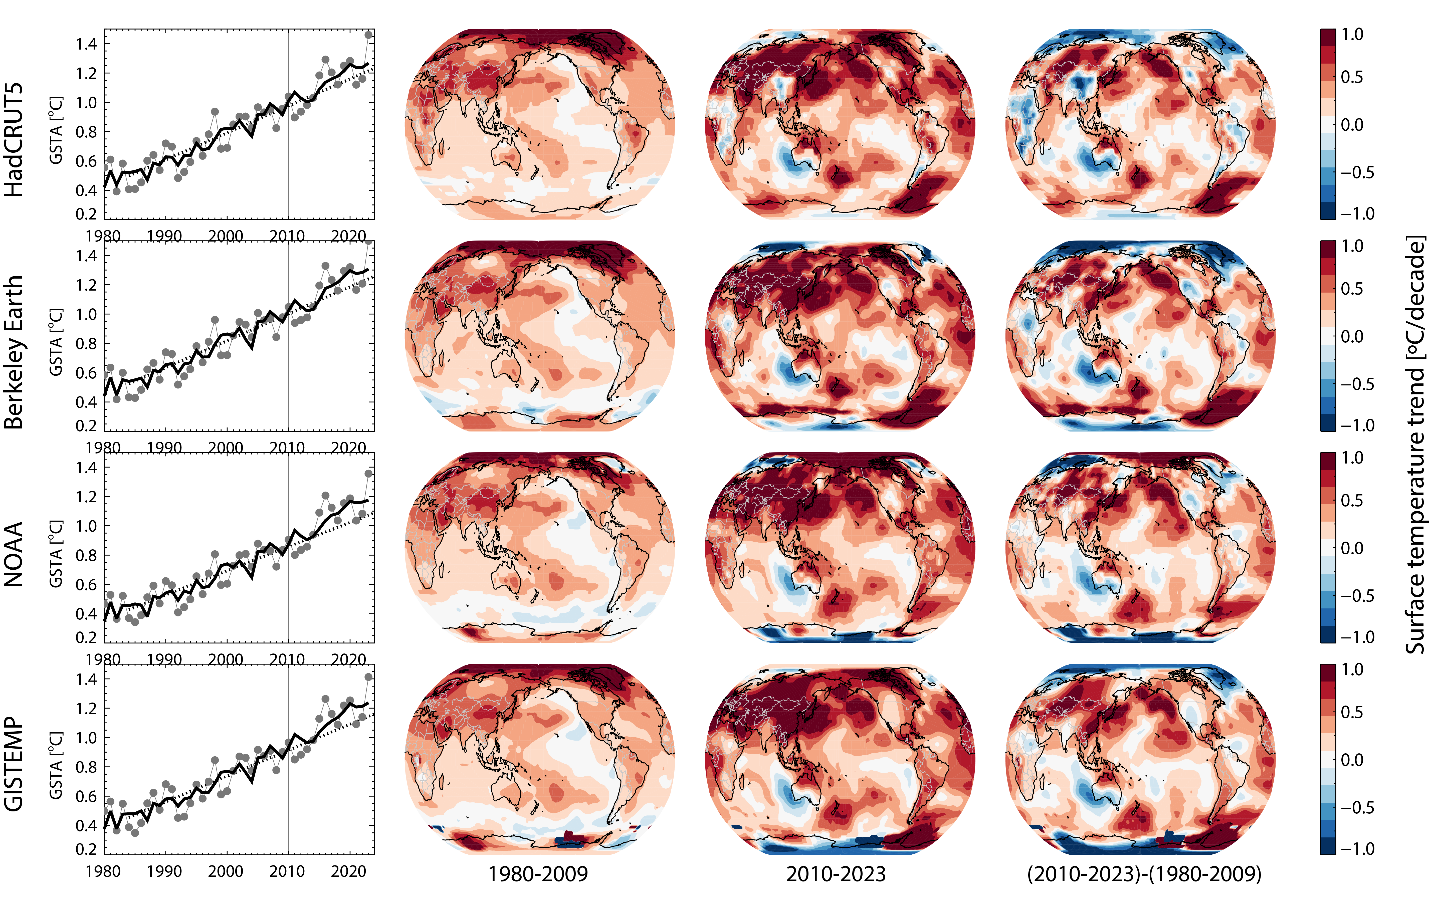


Supplementary Figure 4: Global and regional surface temperature trends from individual reconstructions.

Left: Global, annual mean surface temperature anomalies, relative to 1850-1900 (1880-1900 for GISTEMP) for four reconstructions: HadCRUT5, Berkeley Earth, NOAA and GISTEMP. As in Figure 3, the dashed line shows the 1980-2009 trend, and its continuation through 2023. Subsequent columns show regional trends for 1980-2009 and 2010-2023. The right column shows the difference between the two trend periods.


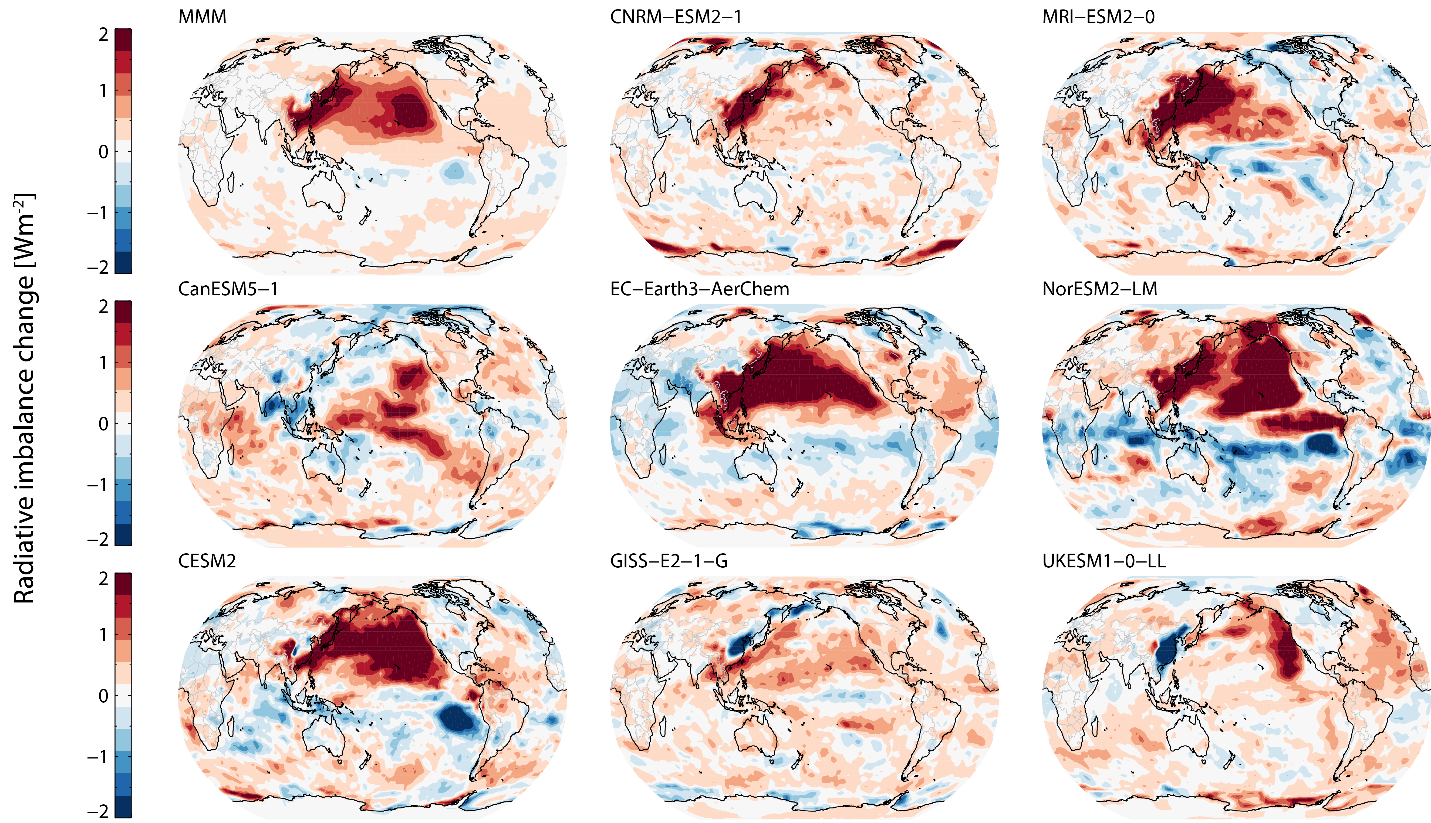


Supplementary Figure 5: RAMIP TOA all sky radiative imbalance response to East Asian aerosol emissions reductions. Multi-model mean and individual model annual mean radiative imbalance (shortwave + longwave) change for the 2035-2049 period, difference between the *East Asia* and *baseline* simulations. Each model result is the mean of 10 ensemble members.


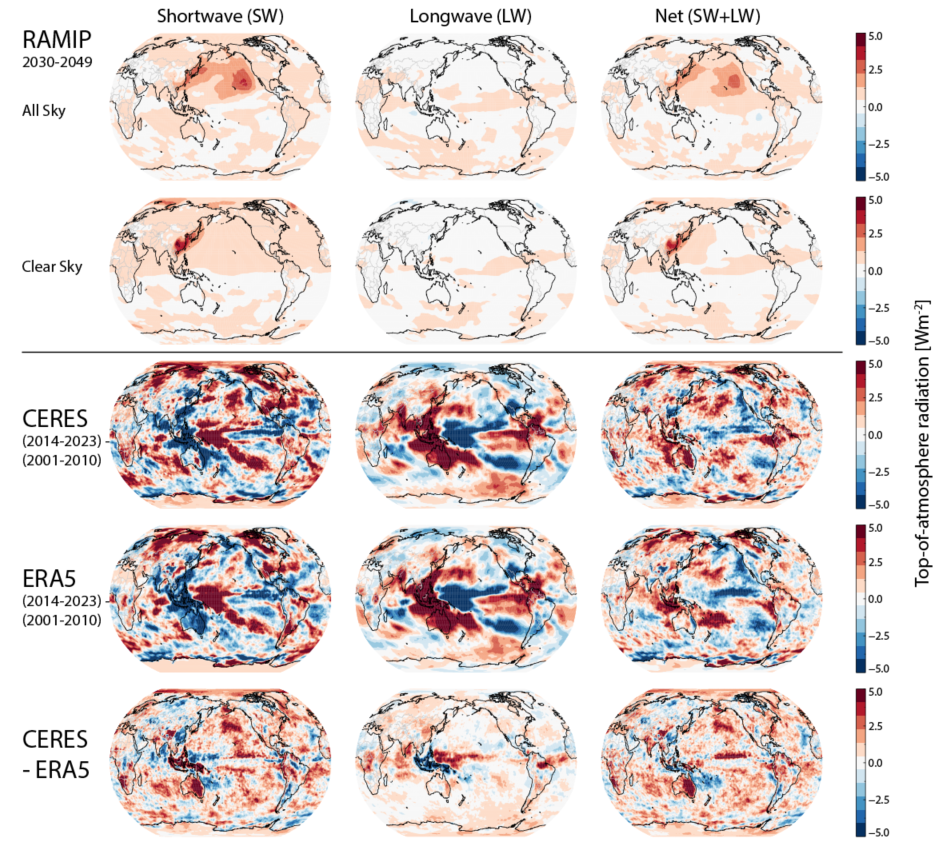


Supplementary Figure 6: Top-of-atmosphere radiative imbalance in RAMIP, observations and reanalysis.

Breakdown of top-of-atmosphere radiative imbalances into shortwave (left), longwave (middle), and net (right) radiation. Two top rows show RAMIP multi-model results for all-sky (i.e. including cloud contributions) and clear sky conditions. Difference between the *East Asia* and *baseline* simulations, 2035-2049. Subsequent rows show results from CERES and ERA5, as the difference between two recent decades (see main text). Last column shows the difference between CERES and ERA5.


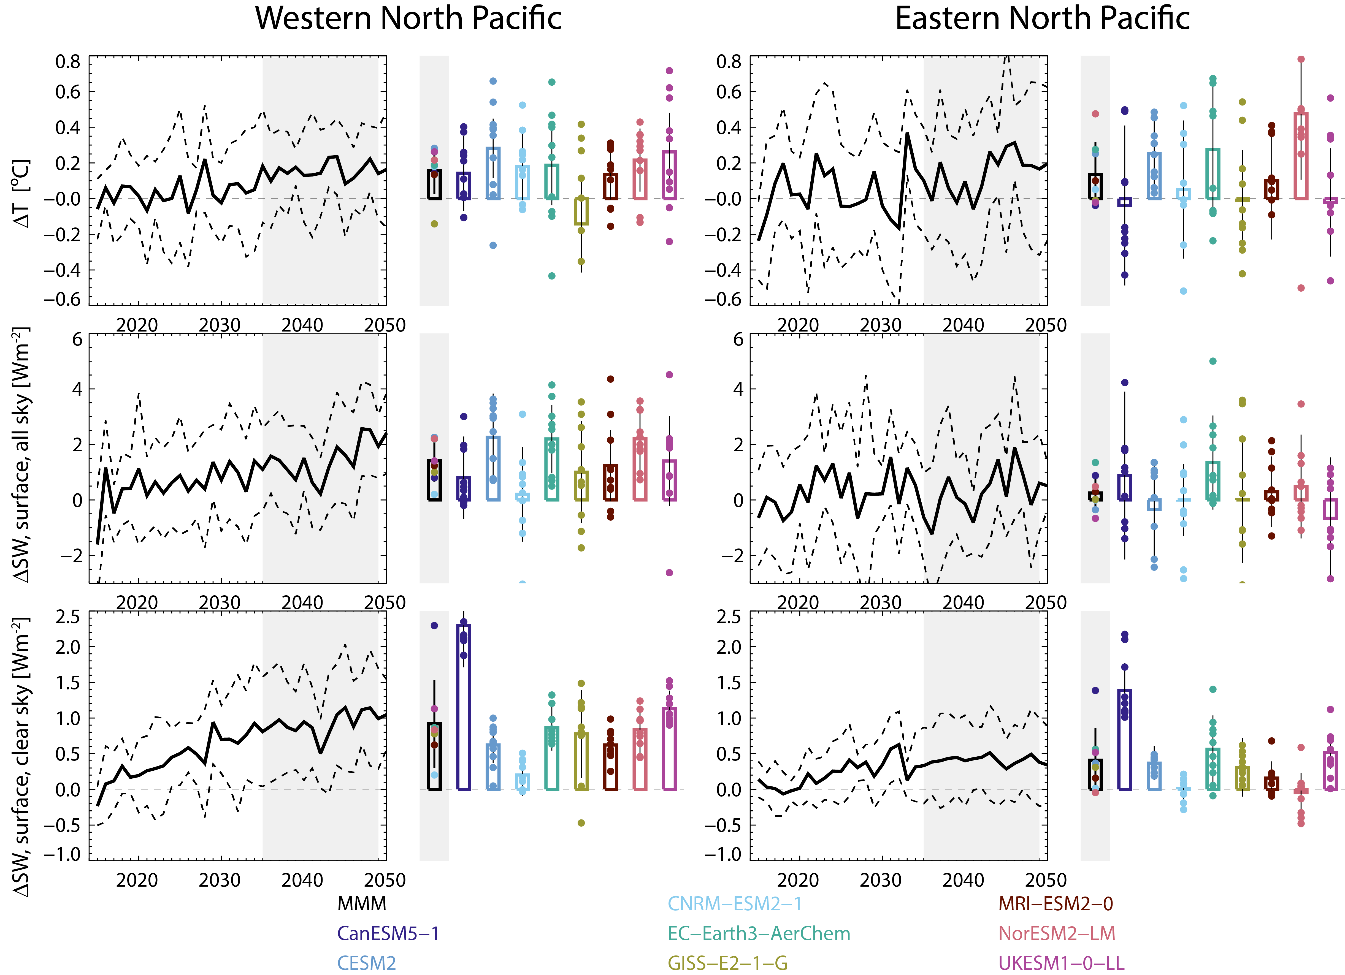


Supplementary Figure 7: RAMIP North Pacific responses

Multi-model and individual model responses in the Western (left) and Eastern (right) North Pacific. Domains used are 120W-180W (West Pacific), 120E-180E (East Pacific), and 25N-52N (both), with an ocean mask applied. Top row: Surface temperature change, as the difference between the *East Asia* and *baseline* simulations for 2035-2049. Middle row: Change in downwelling shortwave radiation for all sky conditions. Bottom row: Same, but for clear sky conditions.

**Supplementary Tables**

Supplementary Table 1: Simulation details

Simulations used in this analysis. For further documentation, see *(17)*. SSP3-7.0 and SSP1-2.6 aerosol emissions are documented in 1.

| Simulation name | RAMIP name | Aerosol emissions | | Time period | Ensemble members | |
| --- | --- | --- | --- | --- | --- | --- |
|  |  | East Asia | Elsewhere |  |  |  |
| *Baseline* | SSP370 | SSP370 | SSP370 | 2015-2050 | 10 |  |
| *East Asia* | SSP370-eas126aer | SSP126 | SSP370 | 2015-2050 | 10 |  |

Supplementary Table 2: RAMIP participating models

Technical details and key reference for RAMIP models included in this analysis

| Centre | Model | Model construction | | | Resolution | | | |  |
| --- | --- | --- | --- | --- | --- | --- | --- | --- | --- |
|  |  | **Atmosphere** | **Aerosol** | **Chemistry** | **Lon** | **Lan** | **Lev** | **Model top** | **Documentation** |
| CCCma | CanESM5-1 | CanAM5 | Interactive | Specified oxidants | 128 | 64 | 49 | 1hPa | 2 |
| NCAR | CESM2 | CAM6 | MAM4 | MAM4 | 288 | 192 | 32 | 2.25hPa | 3 |
| CNRM-CERFACS | CNRM-ESM2-1 | Arpege 6.3 | TACTIC_v2 | REPROBUS-C_v2 | 256 | 128 | 91 | 78.4km | 4 |
| EC-Earth-Consortium | EC-Earth3-AerChem | IFS cy36r4 | TM5 | TM5 | 512 | 256 | 91 | 0.01hPa | 5 |
| NASA-GISS | GISS-E2-1-G (p3) | GISS-E2.1 | OMA | GPUCCINI | 144 | 90 | 40 | 0.1hPa | 6 |
| MRI | MRI-ESM2-0 | MRI-AGCM3.5 | MASINGAR mk2r4 | MRI-CCM2.1 | 320 | 160 | 80 | 0.01hPa | 7 |
| NCC | NorESM2-LM | CAM-OSLO | OsloAero | OsloChemSimp | 144 | 96 | 32 | 3mb | 8 |
| MOHC | UKESM1-0-LL | MetUM-HadGEM3-GA7.1 | UKCA-GLOMAP-mode | UKCA-StratTrop | 192 | 144 | 85 | 85km | 9 |

Supplementary Table 3: RAMIP model and dataset references

Key reference for CMIP6 and RAMIP datasets included in this analysis

| Model | Data reference (historical) | Data reference (RAMIP) |
| --- | --- | --- |
| CanESM5-1 | <https://doi.org/10.22033/ESGF/CMIP6.3610> |  |
| CESM2 | <https://doi.org/10.22033/ESGF/CMIP6.7627> |  |
| CNRM-ESM2-1 | <https://doi.org/10.22033/ESGF/CMIP6.4068> | <https://doi.org/10.22033/ESGF/CMIP6.3924> |
| EC-Earth3-AerChem | <https://doi.org/10.22033/ESGF/CMIP6.4701> | <https://doi.org/10.22033/ESGF/CMIP6.4530> |
| GISS-E2-1-G (p3) | <https://doi.org/10.22033/ESGF/CMIP6.7127> | <https://doi.org/10.22033/ESGF/CMIP6.6984> |
| MRI-ESM2-0 | <https://doi.org/10.22033/ESGF/CMIP6.6842> |  |
| NorESM2-LM | <https://doi.org/10.22033/ESGF/CMIP6.8036> | <https://doi.org/10.22033/ESGF/CMIP6.7848> |
| UKESM1-0-LL | <https://doi.org/10.22033/ESGF/CMIP6.6113> | <https://doi.org/10.22033/ESGF/CMIP6.5857> |

1 Rao, S. *et al.* Future air pollution in the Shared Socio-economic Pathways. *Global Environmental Change* **42**, 346-358, doi:10.1016/j.gloenvcha.2016.05.012 (2017).

2 Swart, N. C. *et al.* The Canadian Earth System Model version 5 (CanESM5.0.3). *Geoscientific Model Development* **12**, 4823-4873, doi:10.5194/gmd-12-4823-2019 (2019).

3 Danabasoglu, G. *et al.* The Community Earth System Model Version 2 (CESM2). *Journal of Advances in Modeling Earth Systems* **12**, doi:10.1029/2019ms001916 (2020).

4 Séférian, R. *et al.* Evaluation of CNRM Earth System Model, CNRM‐ESM2‐1: Role of Earth System Processes in Present‐Day and Future Climate. *Journal of Advances in Modeling Earth Systems* **11**, 4182-4227, doi:10.1029/2019ms001791 (2019).

5 van Noije, T. *et al.* EC-Earth3-AerChem: a global climate model with interactive aerosols and atmospheric chemistry participating in CMIP6. *Geoscientific Model Development* **14**, 5637--5668, doi:10.5194/gmd-14-5637-2021 (2021).

6 Kelley, M. *et al.* GISS-E2.1: Configurations and Climatology. *Journal of Advances in Modeling Earth Systems* **12**, e2019MS002025, doi:<https://doi.org/10.1029/2019MS002025> (2020).

7 Yukimoto, S. *et al.* The Meteorological Research Institute Earth System Model Version 2.0, MRI-ESM2.0: Description and Basic Evaluation of the Physical Component. *Journal of the Meteorological Society of Japan. Ser. II* **97**, 931-965, doi:10.2151/jmsj.2019-051 (2019).

8 Seland, Ø. *et al.* Overview of the Norwegian Earth System Model (NorESM2) and key climate response of CMIP6 DECK, historical, and scenario simulations. *Geoscientific Model Development* **13**, 6165-6200, doi:10.5194/gmd-13-6165-2020 (2020).

9 Sellar, A. A. *et al.* UKESM1: Description and Evaluation of the U.K. Earth System Model. *Journal of Advances in Modeling Earth Systems* **11**, 4513-4558, doi:10.1029/2019ms001739 (2019).
